# Supplementary material
Source: PubMed Central journal article supplement (PMC8416801)
Supplement: NIHMS1731745-supplement-319579_Major_Resources_Table.pdf [file NIHMS1731745-supplement-319579_Major_Resources_Table.pdf]

## Major Resources Table

In order to allow validation and replication of experiments, all essential research materials listed in the Methods should be included in the Major Resources Table below. Authors are encouraged to use public repositories for protocols, data, code, and other materials and provide persistent identifiers and/or links to repositories when available. Authors may add or delete rows as needed.

### Animals (in vivo studies)

| Species                | Vendor or Source                          | Background Strain | Sex  | Persistent ID / URL                                                                                                     |
|------------------------|-------------------------------------------|-------------------|------|-------------------------------------------------------------------------------------------------------------------------|
| Mus musculus castaneus | Jackson Laboratory                        | C57BL/6J          | Male | <a href="https://www.jax.org/strain/000664">https://www.jax.org/strain/000664</a>                                       |
| Mus musculus castaneus | Generated by CRISPR/Cas9 editing, see URL | C57BL/6J          | Male | <a href="https://advances.sciencemag.org/content/5/3/eaav4324">https://advances.sciencemag.org/content/5/3/eaav4324</a> |
|                        |                                           |                   |      |                                                                                                                         |

### Genetically Modified Animals

|                 | Species                | Vendor or Source                 | Background Strain | Other Information                  | Persistent ID / URL                                                               |
|-----------------|------------------------|----------------------------------|-------------------|------------------------------------|-----------------------------------------------------------------------------------|
| Parent - Male   | Mus musculus castaneus | Jax Laboratory                   | C57BL/6J          | -                                  | <a href="https://www.jax.org/strain/000664">https://www.jax.org/strain/000664</a> |
| Parent - Female | Mus musculus castaneus | Generated by CRISPR/Cas9 editing | C57BL/6J          | Heterozygous for DMD $\Delta$ Ex44 |                                                                                   |

### Antibodies

| Target antigen               | Vendor or Source | Catalog # | Working concentration   | Lot # (preferred but not required) | Persistent ID / URL                                                                                                                                                                                                                                                   |
|------------------------------|------------------|-----------|-------------------------|------------------------------------|-----------------------------------------------------------------------------------------------------------------------------------------------------------------------------------------------------------------------------------------------------------------------|
| Dystrophin                   | Sigma-Aldrich    | D8168     | IF: 1:800<br>WB: 1:1000 | N/A                                | <a href="https://www.sigmaaldrich.com/US/en/product/sigma/d8168?context=product">https://www.sigmaaldrich.com/US/en/product/sigma/d8168?context=product</a>                                                                                                           |
| Sarcomeric $\alpha$ -actinin | Sigma-Aldrich    | A7811     | 1:600                   | N/A                                | <a href="https://www.sigmaaldrich.com/US/en/product/sigma/a7811?context=product">https://www.sigmaaldrich.com/US/en/product/sigma/a7811?context=product</a>                                                                                                           |
| Ryanodine Receptor 2         | Sigma-Aldrich    | HPA020028 | 1:200                   | N/A                                | <a href="https://www.sigmaaldrich.com/US/en/product/sigma/hpa020028?context=product">https://www.sigmaaldrich.com/US/en/product/sigma/hpa020028?context=product</a>                                                                                                   |
| Cardiac Troponin I           | Abcam            | 47003     | 1:600                   | N/A                                | <a href="https://www.abcam.com/cardiac-troponin-i-antibody-ab47003.html">https://www.abcam.com/cardiac-troponin-i-antibody-ab47003.html</a>                                                                                                                           |
| Vinculin                     | Sigma-Aldrich    | V9131     | 1:1250                  | N/A                                | <a href="https://www.sigmaaldrich.com/US/en/product/sigma/v9131">https://www.sigmaaldrich.com/US/en/product/sigma/v9131</a>                                                                                                                                           |
| Goat anti-rabbit Alexa 488   | Thermo Fisher    | A11008    | 1:600                   | N/A                                | <a href="https://www.thermofisher.com/antibody/product/Goat-anti-Rabbit-IgG-H-L-Cross-Adsorbed-Secondary-Antibody-Polyclonal/A-11008">https://www.thermofisher.com/antibody/product/Goat-anti-Rabbit-IgG-H-L-Cross-Adsorbed-Secondary-Antibody-Polyclonal/A-11008</a> |
| Goat anti-mouse Alexa 488    | Thermo Fisher    | A11001    | 1:600                   | N/A                                | <a href="https://www.thermofisher.com/antibody/product/Goat-anti-Mouse-IgG-H-L-Cross-Adsorbed-Secondary-Antibody-Polyclonal/A-11001">https://www.thermofisher.com/antibody/product/Goat-anti-Mouse-IgG-H-L-Cross-Adsorbed-Secondary-Antibody-Polyclonal/A-11001</a>   |
| Goat anti-mouse Alexa 647    | Thermo Fisher    | A21235    | 1:600                   | N/A                                | <a href="https://www.thermofisher.com/antibody/product/Goat-anti-Mouse-IgG-H-L-Cross-Adsorbed-Secondary-Antibody-Polyclonal/A-21235">https://www.thermofisher.com/antibody/product/Goat-anti-Mouse-IgG-H-L-Cross-Adsorbed-Secondary-Antibody-Polyclonal/A-21235</a>   |
| Goat anti-mouse IgG1         | Thermo Fisher    | A21121    | 1:600                   | N/A                                | <a href="https://www.thermofisher.com/antibody/product/Goat-anti-Mouse-IgG1-Cross-Adsorbed-Secondary-Antibody-Polyclonal/A-21121">https://www.thermofisher.com/antibody/product/Goat-anti-Mouse-IgG1-Cross-Adsorbed-Secondary-Antibody-Polyclonal/A-21121</a>         |

DOI [to be added]

|                                 |               |         |        |     |                                                                                                                                                                                                                                                                 |
|---------------------------------|---------------|---------|--------|-----|-----------------------------------------------------------------------------------------------------------------------------------------------------------------------------------------------------------------------------------------------------------------|
| Alexa 488                       |               |         |        |     |                                                                                                                                                                                                                                                                 |
| Goat anti-mouse IgG2b Alexa 647 | Thermo Fisher | A21242  | 1:600  | N/A | <a href="https://www.thermofisher.com/antibody/product/Goat-anti-Mouse-IgG2b-Cross-Adsorbed-Secondary-Antibody-Polyclonal/A-21242">https://www.thermofisher.com/antibody/product/Goat-anti-Mouse-IgG2b-Cross-Adsorbed-Secondary-Antibody-Polyclonal/A-21242</a> |
| Goat anti-mouse HRP antibody    | Bio-Rad       | 1706516 | 1:1000 | N/A | <a href="https://www.bio-rad.com/en-us/sku/1706516-goat-anti-mouse-igg-h-l-hrp-conjugate?ID=1706516">https://www.bio-rad.com/en-us/sku/1706516-goat-anti-mouse-igg-h-l-hrp-conjugate?ID=1706516</a>                                                             |

### DNA/cDNA Clones

| Clone Name | Sequence                      | Source / Repository                                             | Persistent ID / URL                                                         |
|------------|-------------------------------|-----------------------------------------------------------------|-----------------------------------------------------------------------------|
| PX458_d44  | gRNA:<br>ATCTTACAGGAACTCCAGGA | PX458<br>construct/Addgene/<br>cloned gRNA in (see<br>sequence) | <a href="https://www.addgene.org/48138/">https://www.addgene.org/48138/</a> |
|            |                               |                                                                 |                                                                             |
|            |                               |                                                                 |                                                                             |

### Cultured Cells

| Name         | Vendor or Source                                                        | Sex (F, M, or unknown) | Persistent ID / URL                                                                                                     |
|--------------|-------------------------------------------------------------------------|------------------------|-------------------------------------------------------------------------------------------------------------------------|
| Control iPSC | Healthy brother of Patient with DMD $\Delta$ Ex44 genotype              | M                      | <a href="https://advances.sciencemag.org/content/5/3/eaav4324">https://advances.sciencemag.org/content/5/3/eaav4324</a> |
| DMD iPSC     | DMD Patient with DMD $\Delta$ Ex44 genotype                             | M                      | <a href="https://advances.sciencemag.org/content/5/3/eaav4324">https://advances.sciencemag.org/content/5/3/eaav4324</a> |
| cDMD-RF iPSC | DMD Patient with DMD $\Delta$ Ex44 genotype corrected by reframing Ex45 | M                      |                                                                                                                         |
| cDMD-ES iPSC | DMD Patient with DMD $\Delta$ Ex44 genotype corrected by skipping Ex45  | M                      |                                                                                                                         |
| Adeno-X 293  | Takara Bio                                                              | Unknown                |                                                                                                                         |

### Data & Code Availability

| Description                                    | Source / Repository    | Persistent ID / URL                                                                                                                                                                                                                                                                                                                                                     |
|------------------------------------------------|------------------------|-------------------------------------------------------------------------------------------------------------------------------------------------------------------------------------------------------------------------------------------------------------------------------------------------------------------------------------------------------------------------|
| MATLAB Code for contractile force measurements | Available upon request | <a href="https://www.cell.com/stem-cell-reports/fulltext/S2213-6711(15)00314-8?_returnURL=https%3A%2F%2Flinkinghub.elsevier.com%2Fretrieve%2Fpii%2FS2213671115003148%3Fshowall%3Dtrue">https://www.cell.com/stem-cell-reports/fulltext/S2213-6711(15)00314-8?_returnURL=https%3A%2F%2Flinkinghub.elsevier.com%2Fretrieve%2Fpii%2FS2213671115003148%3Fshowall%3Dtrue</a> |
| Codes for bulk RNA-seq analysis                | Github                 | <a href="https://github.com/zwang0715/Atmanli_et_al_RNAseq">https://github.com/zwang0715/Atmanli_et_al_RNAseq</a>                                                                                                                                                                                                                                                       |
| Seurat R package for snRNA-seq analysis        | Website of laboratory  | <a href="https://satijalab.org/seurat/">https://satijalab.org/seurat/</a>                                                                                                                                                                                                                                                                                               |

### Other

| Description | Source / Repository | Persistent ID / URL |
|-------------|---------------------|---------------------|
|             |                     |                     |
|             |                     |                     |
|             |                     |                     |

DOI [to be added]
