# Supplementary material
Source: PubMed Central journal article supplement (PMC8416801)
Supplement: NIHMS1731745-supplement-319579_Uncut_Gel_Blots.pdf [file NIHMS1731745-supplement-319579_Uncut_Gel_Blots.pdf]

Full unedited gel for Figure 1D Top  
Red Box: Cropped lanes

Dystrophin

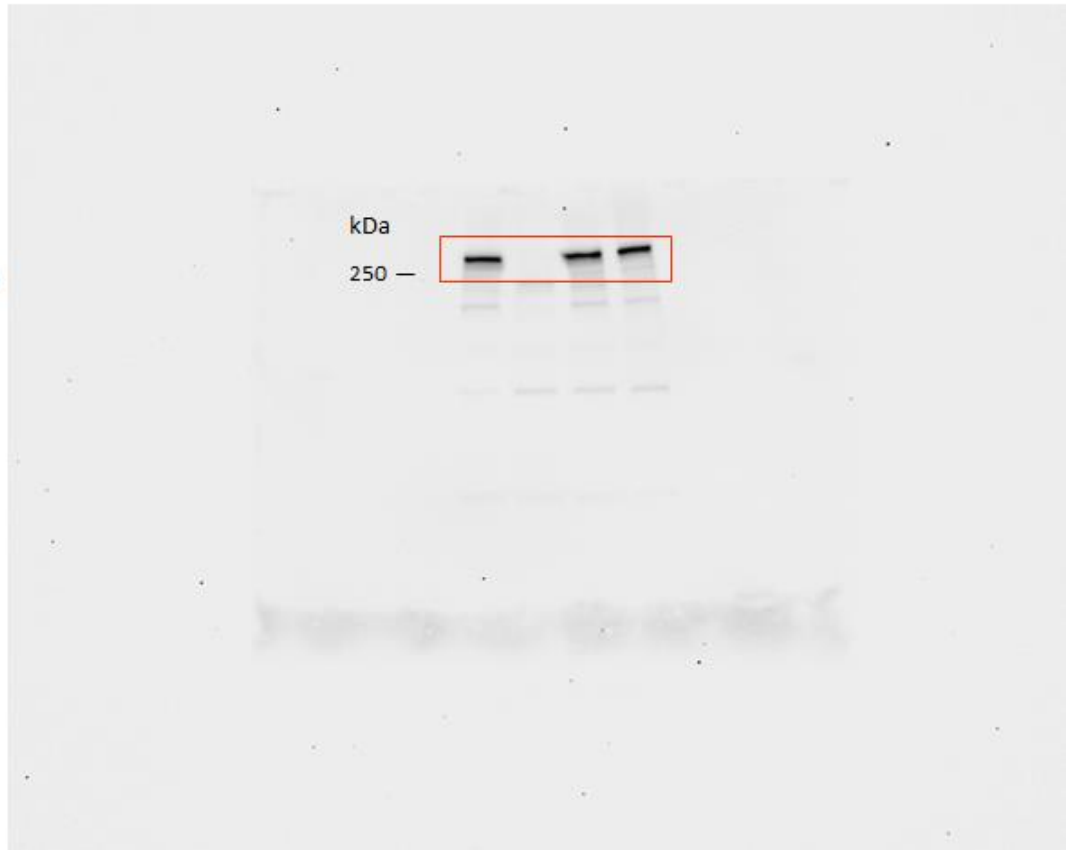

Full unedited gel for Figure 1D Bottom  
Red Box: Cropped lanes

Vinculin

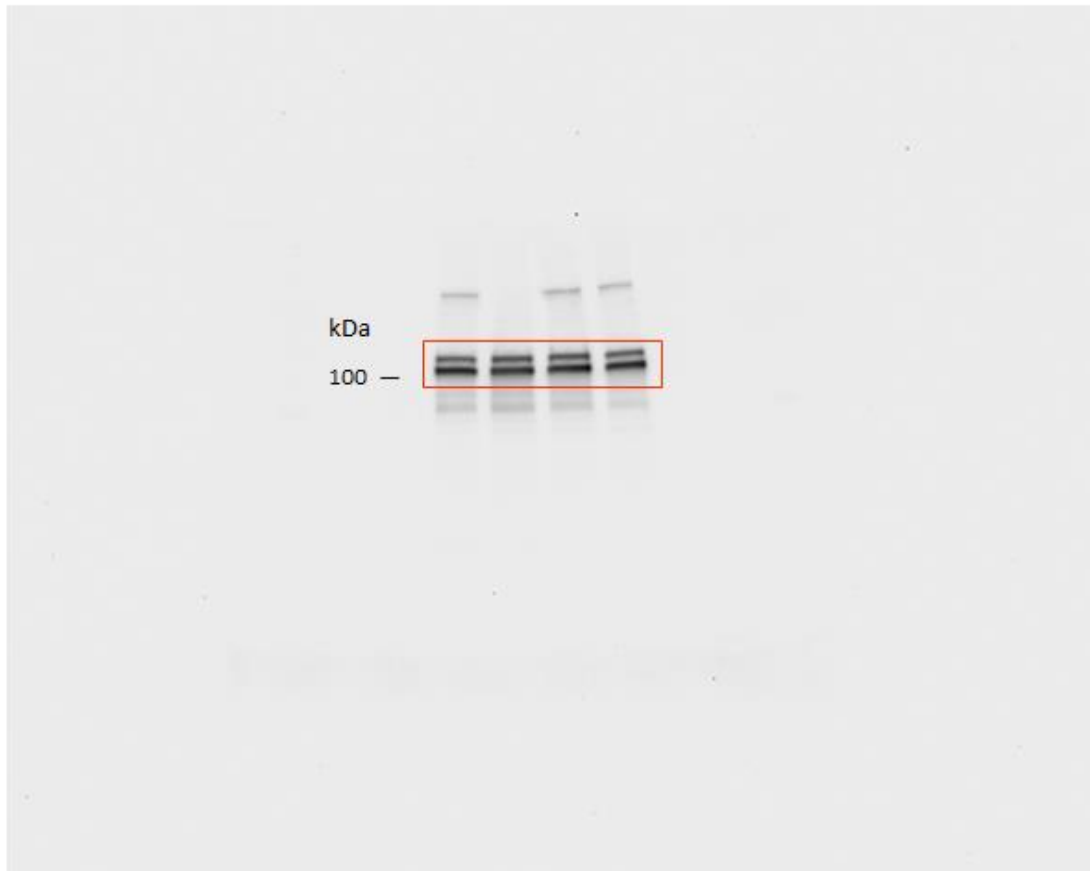

Full unedited gel for Figure 4D Top  
Red Box: Cropped lanes

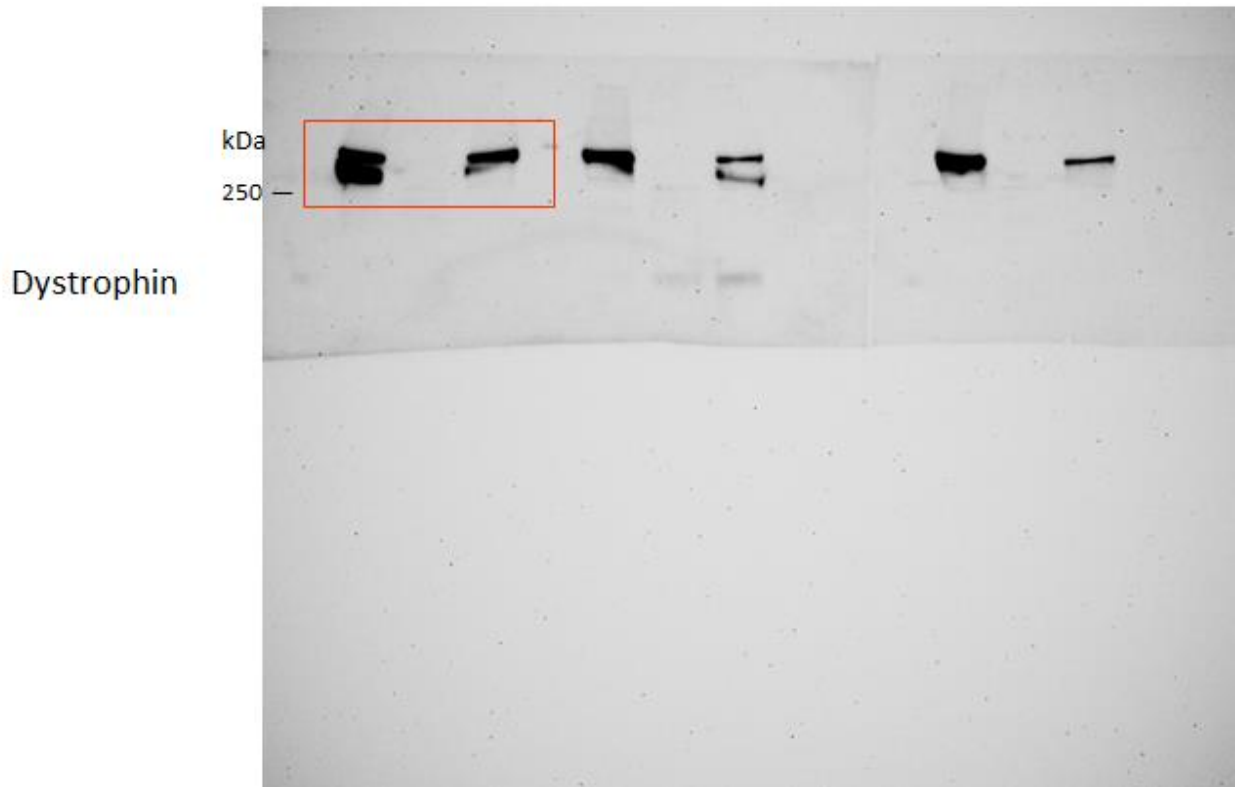

Full unedited gel for Figure 4D Bottom  
Red Box: Cropped lanes

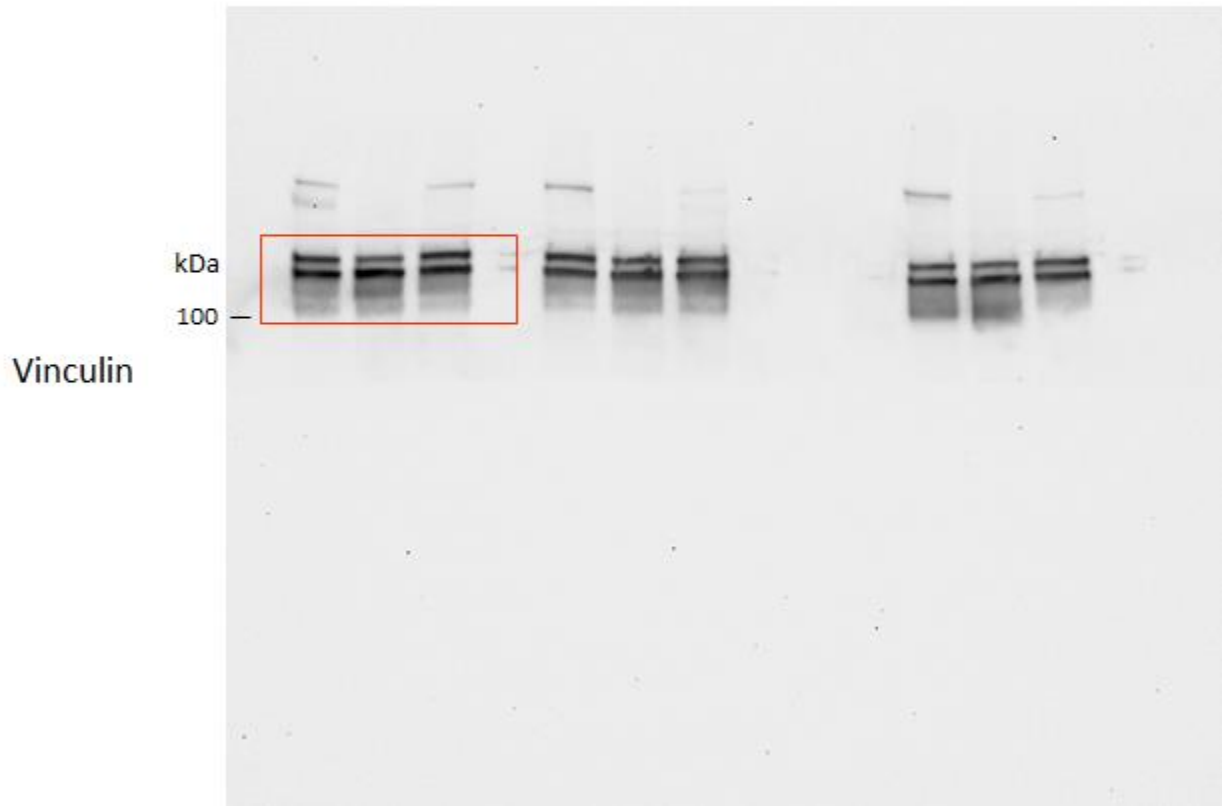

Full unedited gel for Figure 5B Top  
Red Box: Cropped lanes

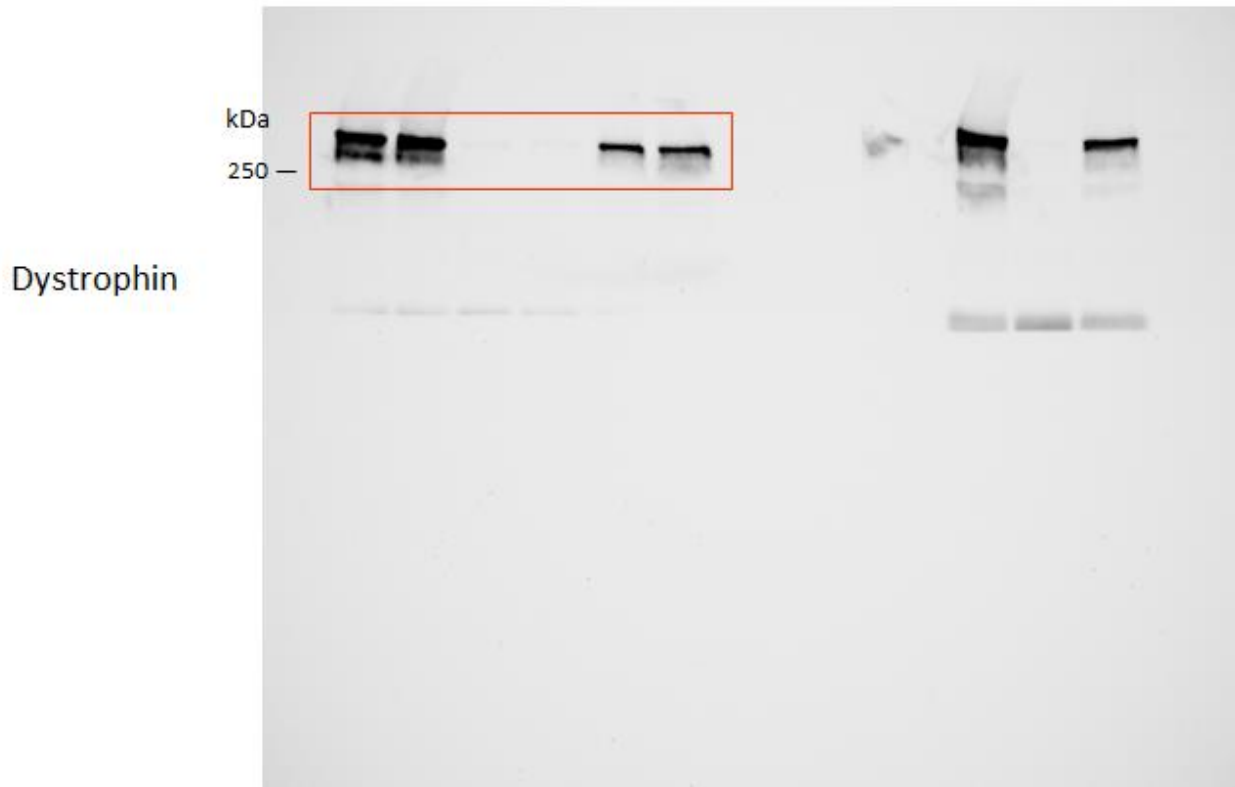

Full unedited gel for Figure 5B Bottom  
Red Box: Cropped lanes

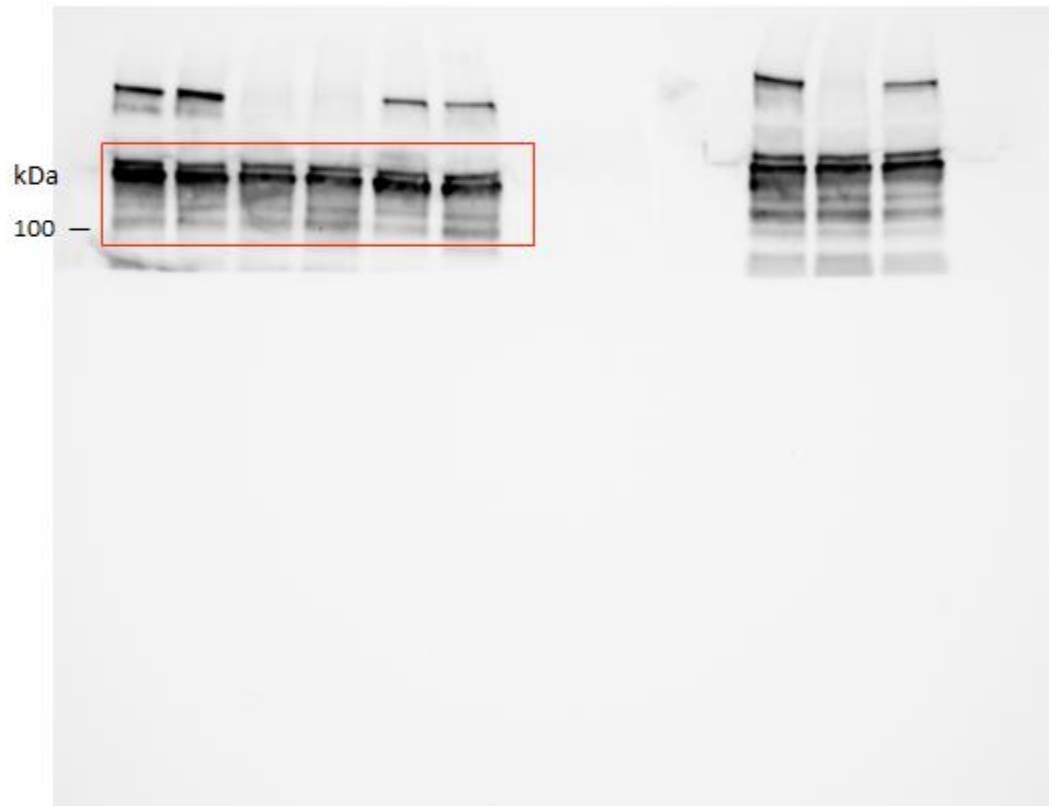

Vinculin
